# Supplementary material for: Screening key genes and signaling pathways in colorectal cancer by integrated bioinformatics analysis
Source: PubMed Central journal article supplement — Mol Med Rep. 2019 Jun 4;20(2):1259–69. doi: 10.3892/mmr.2019.10336 (PMC6625394; doi:10.3892/mmr.2019.10336), 2019-06-04

Figure S1. Heatmap of the top 200 DEGs. (A) GSE113513, (B) GSE9348, (C) GSE22598 and (D) TCGA. Red blocks represent upregulated DEGs and blue blocks represent downregulated DEGs. DEGs, differentially expressed genes; TCGA, The Cancer Genome Atlas.

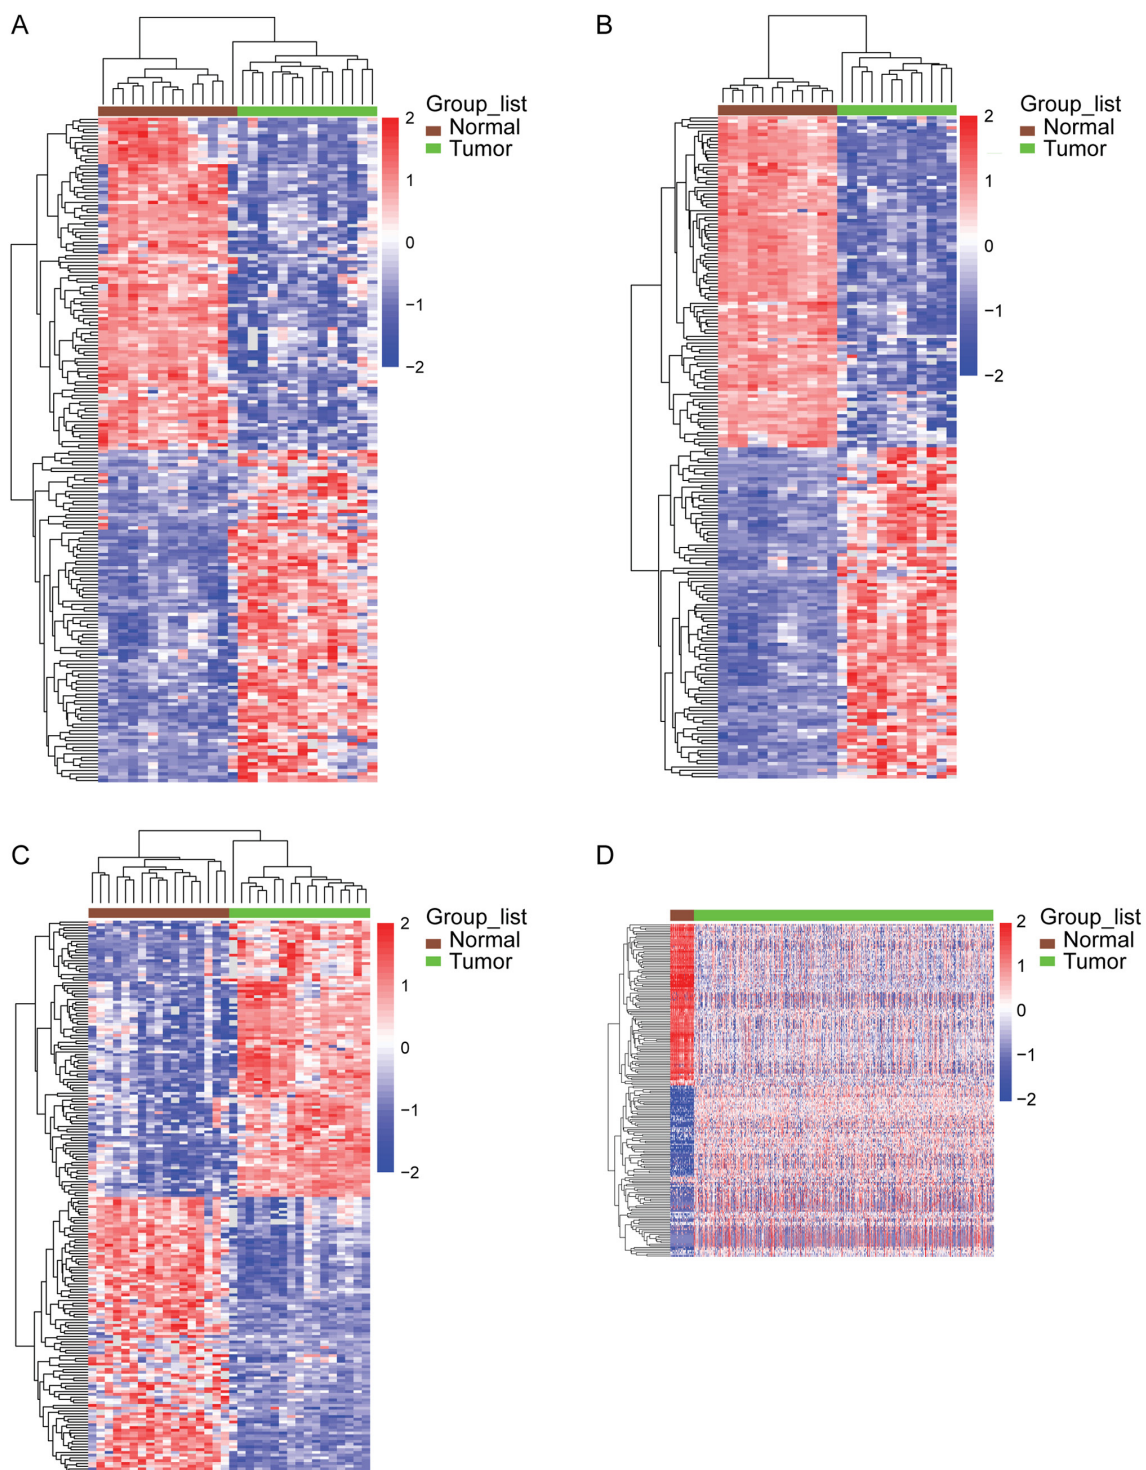

Figure S2. Volcano plots of the DEGs. (A) GSE113513, (B) GSE9348, (C) GSE22598 and (D) TCGA. The red and blue dots indicate upregulated and downregulated DEGs, respectively, while the gray dots represent genes with no significant differences. FC, fold change; DEGs, differentially expressed genes; TCGA, The Cancer Genome Atlas.

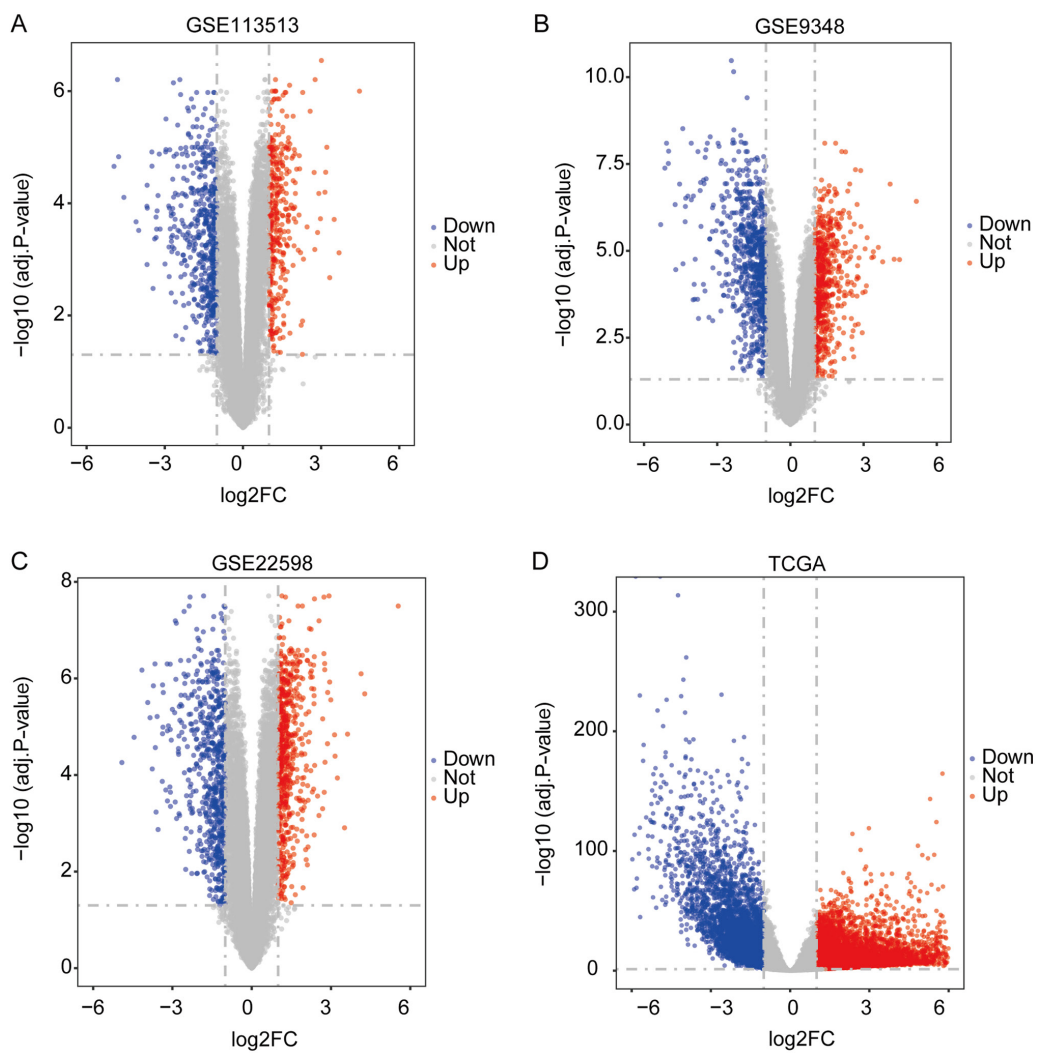

Supplement: Supplementary_Data.pdf [file Supplementary_Data.pdf]
